# Supplementary material for: Switchgrass Establishment Can Ameliorate Soil Properties of the Abandoned Cropland in Northern China
Source: MDPI journal article supplement (doi:10.3390/agriculture12081138), 2022-08-01
Supplement: s1 [file s1]

Archive with 1 entries (1 files):
- agriculture-1846086-supplementary.pdf
