# Supplementary material for: Switchgrass Establishment Can Ameliorate Soil Properties of the Abandoned Cropland in Northern China
Source: MDPI journal article supplement (doi:10.3390/agriculture12081138), 2022-08-01
Supplement: s1 [file s1 › agriculture-1846086-supplementary.pdf]

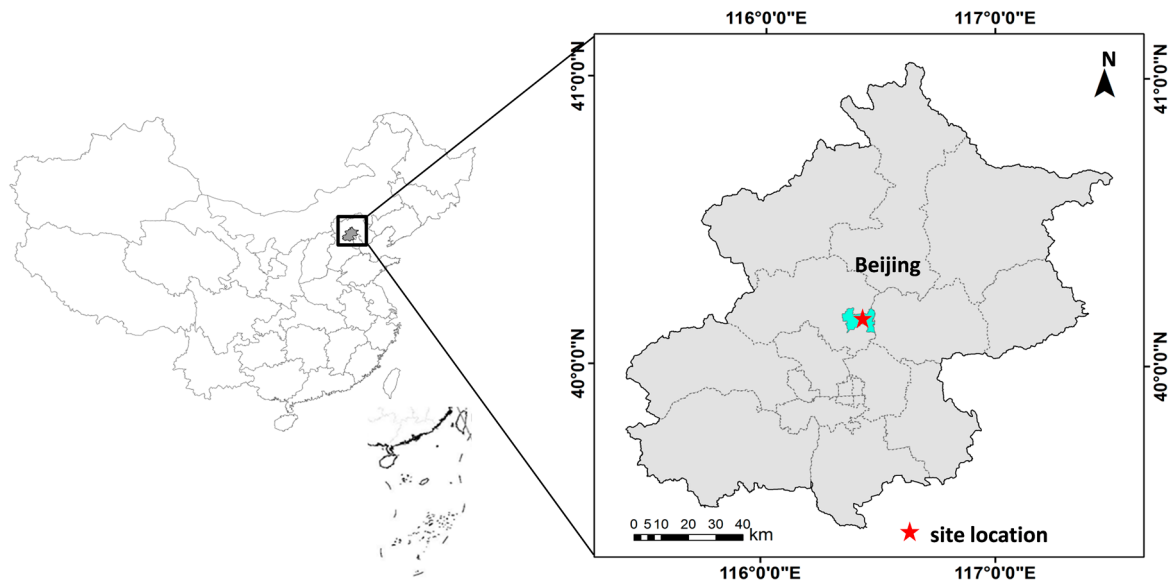

**Figure S1.** Schematic diagram of the experiment site location.

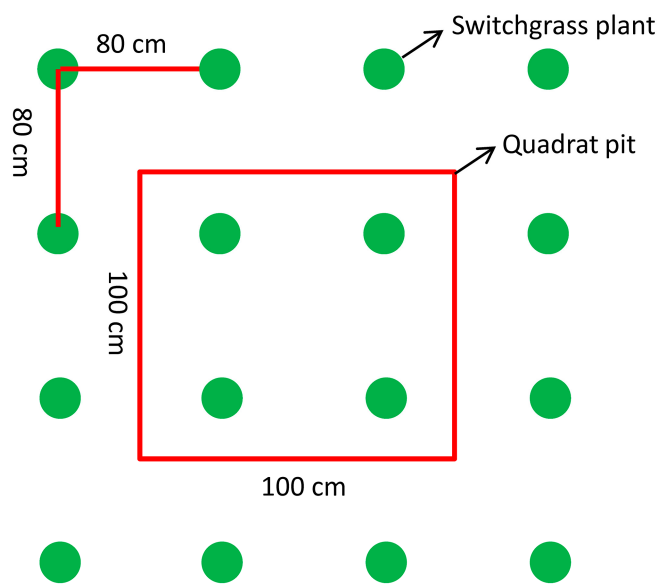

**Figure S2** Schematic diagram of the location of the plot pit.
